# Supplementary material for: Streamflow Estimation in Ungauged Regions using Machine Learning: Quantifying Uncertainties in Geographic Extrapolation
Source: Copernicus journal article supplement (doi:10.5194/hess-2022-320), 2022-09-09

```
In [7]: import umap
mapper = umap.UMAP(n_neighbors=20).fit(overall_post)
import umap.plot
umap.plot.points(mapper, labels = labels)
```

Out[7]: <AxesSubplot:>

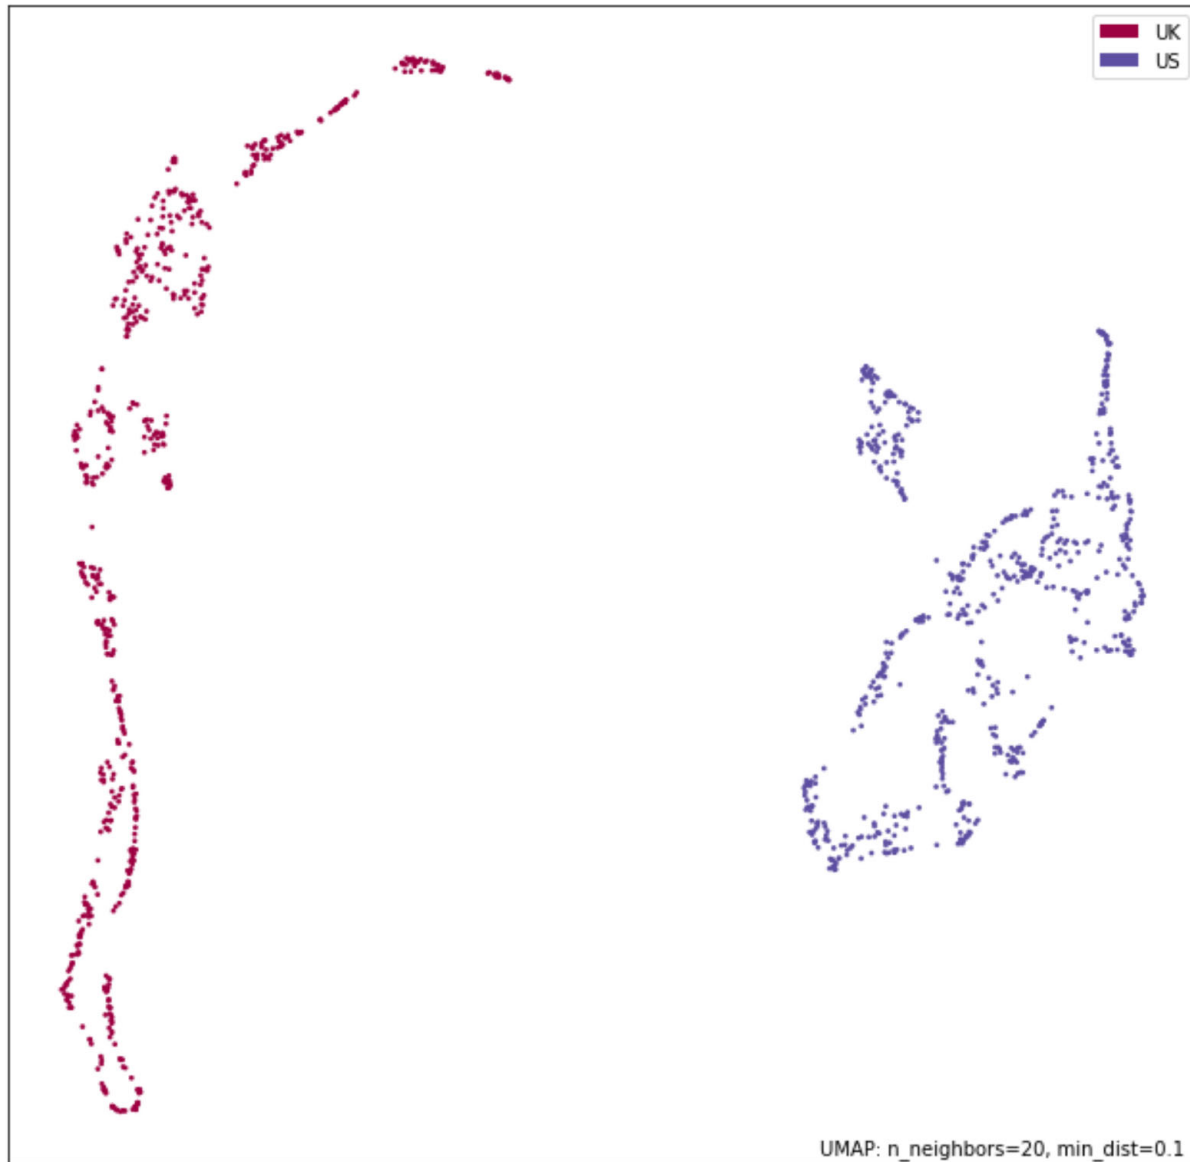

Supplement: Supplementary file [file hess-2022-320-CC1-supplement.pdf]
