# Supplementary material for: Streamflow Estimation in Ungauged Regions using Machine Learning: Quantifying Uncertainties in Geographic Extrapolation
Source: Copernicus journal article supplement (doi:10.5194/hess-2022-320), 2022-09-09
Supplement: Supplementary file [file hess-2022-320-CC2-supplement.pdf]

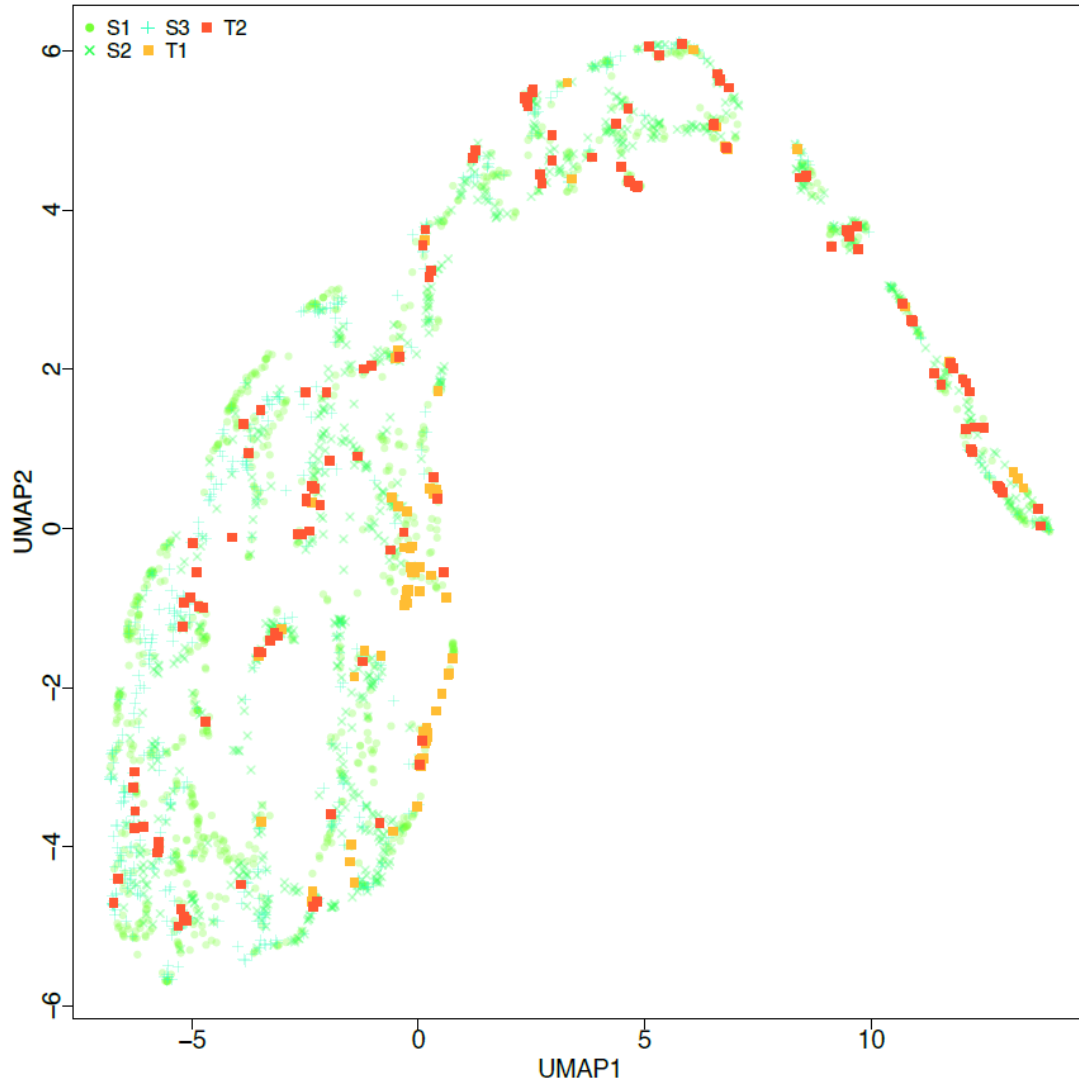

Figure 1. Uniform Manifold Approximation and Projection (UMAP) clustering of the source and target regions that are colored and symbolized by each catchment (Source Region 1 (S1)-North America, Source Region 2 (S2)-South America, Source Region 3 (S3)-Europe, Target Region 1 (T1)-South Africa, Target Region 2 (T2)-Central Asia)
